# Supplementary material for: Reducing Video Verification Burden: Machine Learning Classification of Head Acceleration Events in Youth Football
Source: Research Square preprint supplement (doi:10.21203/rs.3.rs-9368934/v1), 2026-05-20
Supplement: Supplementary file 1 [file 260d31ba6432a026b699327d.docx]

**Supplemental Digital Content**

| **Table A1.** Feature selection for model evaluation | | |
| --- | --- | --- |
| **Feature index** | **Feature name** | **Feature Description** |
| 1 | calibrated_LARes_asd_db_0Hz | Amplitude spectral density values 0-50 Hz for resultant linear acceleration |
| 2 | calibrated_LARes_asd_db_50Hz | Amplitude spectral density values 50-100 Hz for resultant linear acceleration |
| 3 | calibrated_LARes_asd_db_100Hz | Amplitude spectral density values 100-150 Hz for resultant linear acceleration |
| 4 | calibrated_LARes_asd_db_150Hz | Amplitude spectral density values 150-200 Hz for resultant linear acceleration |
| 5 | calibrated_LARes_asd_db_200Hz | Amplitude spectral density values 200-250 Hz for resultant linear acceleration |
| 6 | calibrated_LARes_asd_db_250Hz | Amplitude spectral density values 250-300 Hz for resultant linear acceleration |
| 7 | calibrated_LARes_asd_db_300Hz | Amplitude spectral density values 300-350 Hz for resultant linear acceleration |
| 8 | calibrated_LARes_asd_db_350Hz | Amplitude spectral density values 350-400 Hz for resultant linear acceleration |
| 9 | calibrated_LARes_asd_db_400Hz | Amplitude spectral density values 400-450 Hz for resultant linear acceleration |
| 10 | calibrated_LARes_asd_db_450Hz | Amplitude spectral density values 450-500 Hz for resultant linear acceleration |
| 11 | calibrated_LARes_asd_db_500Hz | Amplitude spectral density values 500-550 Hz for resultant linear acceleration |
| 12 | calibrated_LARes_asd_db_550Hz | Amplitude spectral density values 550-600 Hz for resultant linear acceleration |
| 13 | calibrated_LARes_asd_db_600Hz | Amplitude spectral density values 600-650 Hz for resultant linear acceleration |
| 14 | calibrated_LARes_asd_db_650Hz | Amplitude spectral density values 650-700 Hz for resultant linear acceleration |
| 15 | calibrated_LARes_asd_db_700Hz | Amplitude spectral density values 700-750 Hz for resultant linear acceleration |
| 16 | calibrated_LARes_asd_db_750Hz | Amplitude spectral density values 750-800 Hz for resultant linear acceleration |
| 17 | calibrated_LARes_asd_db_800Hz | Amplitude spectral density values 800-850 Hz for resultant linear acceleration |
| 18 | calibrated_LARes_asd_db_850Hz | Amplitude spectral density values 850-900 Hz for resultant linear acceleration |
| 19 | calibrated_LARes_asd_db_900Hz | Amplitude spectral density values 900-950 Hz for resultant linear acceleration |
| 20 | calibrated_LARes_asd_db_950Hz | Amplitude spectral density values 950-1000 Hz for resultant linear acceleration |
| 21 | calibrated_LARes_asd_db_1000Hz | Amplitude spectral density values 1000-1050 Hz for resultant linear acceleration |
| 22 | calibrated_LARes_asd_db_1050Hz | Amplitude spectral density values 1050-1100 Hz for resultant linear acceleration |
| 23 | calibrated_LARes_asd_db_1100Hz | Amplitude spectral density values 1100-1150 Hz for resultant linear acceleration |
| 24 | calibrated_LARes_asd_db_1150Hz | Amplitude spectral density values 1150-1200 Hz for resultant linear acceleration |
| 25 | calibrated_LARes_asd_db_1200Hz | Amplitude spectral density values 1200-1250 Hz for resultant linear acceleration |
| 26 | calibrated_LARes_asd_db_1250Hz | Amplitude spectral density values 1250-1300 Hz for resultant linear acceleration |
| 27 | calibrated_LARes_asd_db_1300Hz | Amplitude spectral density values 1300-1350 Hz for resultant linear acceleration |
| 28 | calibrated_LARes_asd_db_1350Hz | Amplitude spectral density values 1350-1400 Hz for resultant linear acceleration |
| 29 | calibrated_LARes_asd_db_1400Hz | Amplitude spectral density values 1400-1450 Hz for resultant linear acceleration |
| 30 | calibrated_LARes_asd_db_1450Hz | Amplitude spectral density values 1450-1500 Hz for resultant linear acceleration |
| 31 | calibrated_LARes_asd_db_1500Hz | Amplitude spectral density values 1500-1550 Hz for resultant linear acceleration |
| 32 | calibrated_LARes_asd_db_1550Hz | Amplitude spectral density values 1550-1600 Hz for resultant linear acceleration |
| 33 | calibrated_LARes_asd_db_1600Hz | Amplitude spectral density values 1600-1650 Hz for resultant linear acceleration |
| 34 | calibrated_RVRes_asd_db_0Hz | Amplitude spectral density values 0-50 Hz for resultant rotational velocity |
| 35 | calibrated_RVRes_asd_db_50Hz | Amplitude spectral density values 50-100 Hz for resultant rotational velocity |
| 36 | calibrated_RVRes_asd_db_100Hz | Amplitude spectral density values 100-150 Hz for resultant rotational velocity |
| 37 | calibrated_RVRes_asd_db_150Hz | Amplitude spectral density values 150-200 Hz for resultant rotational velocity |
| 38 | calibrated_RVRes_asd_db_200Hz | Amplitude spectral density values 200-250 Hz for resultant rotational velocity |
| 39 | calibrated_RVRes_asd_db_250Hz | Amplitude spectral density values 250-300 Hz for resultant rotational velocity |
| 40 | calibrated_RVRes_asd_db_300Hz | Amplitude spectral density values 300-350 Hz for resultant rotational velocity |
| 41 | calibrated_RVRes_asd_db_350Hz | Amplitude spectral density values 350-400 Hz for resultant rotational velocity |
| 42 | calibrated_RVRes_asd_db_400Hz | Amplitude spectral density values 400-450 Hz for resultant rotational velocity |
| 43 | calibrated_RVRes_asd_db_450Hz | Amplitude spectral density values 450-500 Hz for resultant linear acceleration |
| 44 | calibrated_RVRes_asd_db_500Hz | Amplitude spectral density values 500-550 Hz for resultant rotational velocity |
| 45 | calibrated_RVRes_asd_db_550Hz | Amplitude spectral density values 550-600 Hz for resultant rotational velocity |
| 46 | calibrated_RVRes_asd_db_600Hz | Amplitude spectral density values 600-650 Hz for resultant rotational velocity |
| 47 | calibrated_RVRes_asd_db_650Hz | Amplitude spectral density values 650-700 Hz for resultant rotational velocity |
| 48 | calibrated_RVRes_asd_db_700Hz | Amplitude spectral density values 700-750 Hz for resultant rotational velocity |
| 49 | calibrated_RVRes_asd_db_750Hz | Amplitude spectral density values 750-800 Hz for resultant rotational velocity |
| 50 | calibrated_RVRes_asd_db_800Hz | Amplitude spectral density values 800-850 Hz for resultant rotational velocity |
| 51 | calibrated_RVRes_asd_db_850Hz | Amplitude spectral density values 850-900 Hz for resultant rotational velocity |
| 52 | calibrated_RVRes_asd_db_900Hz | Amplitude spectral density values 900-950 Hz for resultant rotational velocity |
| 53 | calibrated_RVRes_asd_db_950Hz | Amplitude spectral density values 950-1000 Hz for resultant rotational velocity |
| 54 | calibrated_RVRes_asd_db_1000Hz | Amplitude spectral density values 1000-1050 Hz for resultant rotational velocity |
| 55 | calibrated_RVRes_asd_db_1050Hz | Amplitude spectral density values 1050-1100 Hz for resultant rotational velocity |
| 56 | calibrated_RVRes_asd_db_1100Hz | Amplitude spectral density values 1100-1150 Hz for resultant rotational velocity |
| 57 | calibrated_RVRes_asd_db_1150Hz | Amplitude spectral density values 1150-1200 Hz for resultant rotational velocity |
| 58 | calibrated_RVRes_asd_db_1200Hz | Amplitude spectral density values 1200-1250 Hz for resultant rotational velocity |
| 59 | calibrated_RVRes_asd_db_1250Hz | Amplitude spectral density values 1250-1300 Hz for resultant rotational velocity |
| 60 | calibrated_RVRes_asd_db_1300Hz | Amplitude spectral density values 1300-1350 Hz for resultant rotational velocity |
| 61 | calibrated_RVRes_asd_db_1350Hz | Amplitude spectral density values 1350-1400 Hz for resultant rotational velocity |
| 62 | calibrated_RVRes_asd_db_1400Hz | Amplitude spectral density values 1400-1450 Hz for resultant rotational velocity |
| 63 | calibrated_RVRes_asd_db_1450Hz | Amplitude spectral density values 1450-1500 Hz for resultant rotational velocity |
| 64 | calibrated_RVRes_asd_db_1500Hz | Amplitude spectral density values 1500-1550 Hz for resultant rotational velocity |
| 65 | calibrated_RVRes_asd_db_1550Hz | Amplitude spectral density values 1550-1600 Hz for resultant Rotational velocity |
| 66 | calibrated_RVRes_asd_db_1600Hz | Amplitude spectral density values 1600-1650 Hz for resultant rotational velocity |
| 67 | PLA_X | Maximum absolute value linear acceleration in the x axis |
| 68 | Peak_to_Peak_PLA_X | Peak to peak from maximum to minimum absolute value linear acceleration in the x axis |
| 69 | RMS_Amplitude_PLA_X | Root mean square amplitude linear acceleration in the x axis |
| 70 | zerocrossrate_PLA_X | Zero cross rate linear acceleration in the x axis |
| 71 | Numzerocross_PLA_X | Number of zero cross linear acceleration in the x axis |
| 72 | Jerk_PLA_X | Maximum absolute value of derivative linear acceleration in the x axis |
| 73 | Area_Curve_PLA_X | Area under the curve (integral) using trapezoidal numerical integration for linear acceleration in the x axis |
| 74 | Sample_Entropy_PLA_X | Sample entropy for linear acceleration in the x axis |
| 75 | Five_percentile_PLA_X | 5 percentile value for linear acceleration in the x axis |
| 76 | Fifty_percentile_PLA_X | 50 percentile value for linear acceleration in the x axis |
| 77 | Nine_five_percentile_PLA_X | 95 percentile value for linear acceleration in the x axis |
| 78 | Avg_Slope_PLA_X | Average slope for linear acceleration in the x axis |
| 79 | PLA_X_Area_curve_1_16 | Area under the curve sample 1 to 16 for linear acceleration in the x axis |
| 80 | PLA_X_Area_curve_17_32 | Area under the curve sample 17 to 32 for linear acceleration in the x axis |
| 81 | PLA_X_Area_curve_33_48 | Area under the curve sample 33 to 48 for linear acceleration in the x axis |
| 82 | PLA_X_Area_curve_49_64 | Area under the curve sample 49 to 64 for linear acceleration in the x axis |
| 83 | PLA_X_Area_curve_65_80 | Area under the curve sample 65 to 80 for linear acceleration in the x axis |
| 84 | PLA_X_Area_curve_81_96 | Area under the curve sample 81 to 96 for linear acceleration in the x axis |
| 85 | PLA_X_Area_curve_97_112 | Area under the curve sample 97 to 112 for linear acceleration in the x axis |
| 86 | PLA_X_Area_curve_113_128 | Area under the curve sample 113 to 128 for linear acceleration in the x axis |
| 87 | PLA_X_Area_curve_129_144 | Area under the curve sample 129 to 144 for linear acceleration in the x axis |
| 88 | PLA_X_Area_curve_145_160 | Area under the curve sample 145 to 160 for linear acceleration in the x axis |
| 89 | HFD_PLA_X | Higuchi fractal dimension for linear acceleration in the x axis |
| 90 | PLA_Y | Maximum absolute value linear acceleration in the y axis |
| 91 | Peak_to_Peak_PLA_Y | Peak to peak from maximum to minimum absolute value linear acceleration in the y axis |
| 92 | RMS_Amplitude_PLA_Y | Root mean square amplitude linear acceleration in the y axis |
| 93 | zerocrossrate_PLA_Y | Zero cross rate linear acceleration in the y axis |
| 94 | Numzerocross_PLA_Y | Number of zero cross linear acceleration in the y axis |
| 95 | Jerk_PLA_Y | Maximum absolute value of derivative linear acceleration in the y axis |
| 96 | Area_Curve_PLA_Y | Area under the curve (integral) using trapezoidal numerical integration for linear acceleration in the y axis |
| 97 | Sample_Entropy_PLA_Y | Sample entropy for linear acceleration in the y axis |
| 98 | Five_percentile_PLA_Y | 5 percentile value for linear acceleration in the y axis |
| 99 | Fifty_percentile_PLA_Y | 50 percentile value for linear acceleration in the y axis |
| 100 | Nine_five_percentile_PLA_Y | 95 percentile value for linear acceleration in the y axis |
| 101 | Avg_Slope_PLA_Y | Average slope for linear acceleration in the y axis |
| 102 | PLA_Y_Area_curve_1_16 | Area under the curve sample 1 to 16 for linear acceleration in the y axis |
| 103 | PLA_Y_Area_curve_17_32 | Area under the curve sample 17 to 32 for linear acceleration in the y axis |
| 104 | PLA_Y_Area_curve_33_48 | Area under the curve sample 33 to 48 for linear acceleration in the y axis |
| 105 | PLA_Y_Area_curve_49_64 | Area under the curve sample 49 to 64 for linear acceleration in the y axis |
| 106 | PLA_Y_Area_curve_65_80 | Area under the curve sample 65 to 80 for linear acceleration in the y axis |
| 107 | PLA_Y_Area_curve_81_96 | Area under the curve sample 81 to 96 for linear acceleration in the y axis |
| 108 | PLA_Y_Area_curve_97_112 | Area under the curve sample 97 to 112 for linear acceleration in the y axis |
| 109 | PLA_Y_Area_curve_113_128 | Area under the curve sample 113 to 128 for linear acceleration in the y axis |
| 110 | PLA_Y_Area_curve_129_144 | Area under the curve sample 129 to 144 for linear acceleration in the y axis |
| 111 | PLA_Y_Area_curve_145_160 | Area under the curve sample 145 to 160 for linear acceleration in the y axis |
| 112 | HFD_PLA_Y | Higuchi fractal dimension for linear acceleration in the y axis |
| 113 | PLA_Z | Maximum absolute value linear acceleration in the z axis |
| 114 | Peak_to_Peak_PLA_Z | Peak to peak from maximum to minimum absolute value linear acceleration in the z axis |
| 115 | RMS_Amplitude_PLA_Z | Root mean square amplitude linear acceleration in the z axis |
| 116 | zerocrossrate_PLA_Z | Zero cross rate linear acceleration in the z axis |
| 117 | Numzerocross_PLA_Z | Number of zero cross linear acceleration in the z axis |
| 118 | Jerk_PLA_Z | Maximum absolute value of derivative linear acceleration in the z axis |
| 119 | Area_Curve_PLA_Z | Area under the curve (integral) using trapezoidal numerical integration for linear acceleration in the z axis |
| 120 | Sample_Entropy_PLA_Z | Sample entropy for linear acceleration in the z axis |
| 121 | Five_percentile_PLA_Z | 5 percentile value for linear acceleration in the z axis |
| 122 | Fifty_percentile_PLA_Z | 50 percentile value for linear acceleration in the z axis |
| 123 | Nine_five_percentile_PLA_Z | 95 percentile value for linear acceleration in the z axis |
| 124 | Avg_Slope_PLA_Z | Average slope for linear acceleration in the z axis |
| 125 | PLA_Z_Area_curve_1_16 | Area under the curve sample 1 to 16 for linear acceleration in the z axis |
| 126 | PLA_Z_Area_curve_17_32 | Area under the curve sample 17 to 32 for linear acceleration in the z axis |
| 127 | PLA_Z_Area_curve_33_48 | Area under the curve sample 33 to 48 for linear acceleration in the z axis |
| 128 | PLA_Z_Area_curve_49_64 | Area under the curve sample 49 to 64 for linear acceleration in the z axis |
| 129 | PLA_Z_Area_curve_65_80 | Area under the curve sample 65 to 80 for linear acceleration in the z axis |
| 130 | PLA_Z_Area_curve_81_96 | Area under the curve sample 81 to 96 for linear acceleration in the z axis |
| 131 | PLA_Z_Area_curve_97_112 | Area under the curve sample 97 to 112 for linear acceleration in the z axis |
| 132 | PLA_Z_Area_curve_113_128 | Area under the curve sample 113 to 128 for linear acceleration in the z axis |
| 133 | PLA_Z_Area_curve_129_144 | Area under the curve sample 129 to 144 for linear acceleration in the z axis |
| 134 | PLA_Z_Area_curve_145_160 | Area under the curve sample 145 to 160 for linear acceleration in the z axis |
| 135 | HFD_PLA_Z | Higuchi fractal dimension for linear acceleration in the z axis |
| 136 | PLA_Res | Maximum absolute value resultant linear acceleration |
| 137 | Peak_to_Peak_PLA_Res | Peak to peak from maximum to minimum absolute value resultant linear acceleration |
| 138 | RMS_Amplitude_PLA_Res | Root mean square amplitude resultant linear acceleration |
| 139 | zerocrossrate_PLA_Res | Zero cross rate resultant linear acceleration |
| 140 | Numzerocross_PLA_Res | Number of zero cross resultant linear acceleration |
| 141 | Jerk_PLA_Res | Maximum absolute value of derivative resultant linear acceleration |
| 142 | Area_Curve_PLA_Res | Area under the curve (integral) using trapezoidal numerical integration for resultant linear acceleration |
| 143 | Sample_Entropy_PLA_Res | Sample entropy for resultant linear acceleration |
| 144 | Five_percentile_PLA_Res | 5 percentile value for resultant linear acceleration |
| 145 | Fifty_percentile_PLA_Res | 50 percentile value for resultant linear acceleration |
| 146 | Nine_five_percentile_PLA_Res | 95 percentile value for resultant linear acceleration |
| 147 | Avg_Slope_PLA_Res | Average slope for resultant linear acceleration |
| 148 | PLA_Res_Area_curve_1_16 | Area under the curve sample 1 to 16 for resultant linear acceleration |
| 149 | PLA_Res_Area_curve_17_32 | Area under the curve sample 17 to 32 for resultant linear acceleration |
| 150 | PLA_Res_Area_curve_33_48 | Area under the curve sample 33 to 48 for resultant linear acceleration |
| 151 | PLA_Res_Area_curve_49_64 | Area under the curve sample 49 to 64 for resultant linear acceleration |
| 152 | PLA_Res_Area_curve_65_80 | Area under the curve sample 65 to 80 for resultant linear acceleration |
| 153 | PLA_Res_Area_curve_81_96 | Area under the curve sample 81 to 96 for resultant linear acceleration |
| 154 | PLA_Res_Area_curve_97_112 | Area under the curve sample 97 to 112 for resultant linear acceleration |
| 155 | PLA_Res_Area_curve_113_128 | Area under the curve sample 113 to 128 for resultant linear acceleration |
| 156 | PLA_Res_Area_curve_129_144 | Area under the curve sample 129 to 144 for resultant linear acceleration |
| 157 | PLA_Res_Area_curve_145_160 | Area under the curve sample 145 to 160 for resultant linear acceleration |
| 158 | HFD_PLA_Res | Higuchi fractal dimension for resultant linear acceleration |
| 159 | PRV_X | Maximum absolute value rotational velocity in the x axis |
| 160 | Peak_to_Peak_PRV_X | Peak to peak from maximum to minimum absolute value for rotational velocity in the x axis |
| 161 | zerocrossrate_PRV_X | Zero cross rate rotational velocity in the x axis |
| 162 | Numzerocross_PRV_X | Number of zero cross rotational velocity in the x axis |
| 163 | RA_PRV_X | Maximum absolute value of derivative rotational velocity in the x axis |
| 164 | Area_Curve_PRV_X | Area under the curve (integral) using trapezoidal numerical integration for rotational velocity in the x axis |
| 165 | Sample_Entropy_PRV_X | Sample entropy for rotational velocity in the x axis |
| 166 | Five_percentile_PRV_X | 5 percentile value for rotational velocity in the x axis |
| 167 | Fifty_percentile_PRV_X | 50 percentile value for rotational velocity in the x axis |
| 168 | Nine_five_percentile_PRV_X | 95 percentile value for rotational velocity in the x axis |
| 169 | Avg_Slope_PRV_X | Average slope for rotational velocity in the x axis |
| 170 | PRV_X_Area_curve_1_16 | Area under the curve sample 1 to 16 for rotational velocity in the x axis |
| 171 | PRV_X_Area_curve_17_32 | Area under the curve sample 17 to 32 for rotational velocity in the x axis |
| 172 | PRV_X_Area_curve_33_48 | Area under the curve sample 33 to 48 for rotational velocity in the x axis |
| 173 | PRV_X_Area_curve_49_64 | Area under the curve sample 49 to 64 for rotational velocity in the x axis |
| 174 | PRV_X_Area_curve_65_80 | Area under the curve sample 65 to 80 for rotational velocity in the x axis |
| 175 | PRV_X_Area_curve_81_96 | Area under the curve sample 81 to 96 for rotational velocity in the x axis |
| 176 | PRV_X_Area_curve_97_112 | Area under the curve sample 97 to 112 for rotational velocity in the x axis |
| 177 | PRV_X_Area_curve_113_128 | Area under the curve sample 113 to 128 for rotational velocity in the x axis |
| 178 | PRV_X_Area_curve_129_144 | Area under the curve sample 129 to 144 for rotational velocity in the x axis |
| 179 | PRV_X_Area_curve_145_160 | Area under the curve sample 145 to 160 for rotational velocity in the x axis |
| 180 | HFD_PRV_X | Higuchi fractal dimension for rotational velocity in the x axis |
| 181 | PRV_Y | Maximum absolute value rotational velocity in the y axis |
| 182 | Peak_to_Peak_PRV_Y | Peak to peak from maximum to minimum absolute value for rotational velocity in the y axis |
| 183 | zerocrossrate_PRV_Y | Zero cross rate rotational velocity in the y axis |
| 184 | Numzerocross_PRV_Y | Number of zero cross rotational velocity in the y axis |
| 185 | RA_PRV_Y | Maximum absolute value of derivative rotational velocity in the y axis |
| 186 | Area_Curve_PRV_Y | Area under the curve (integral) using trapezoidal numerical integration for rotational velocity in the y axis |
| 187 | Sample_Entropy_PRV_Y | Sample entropy for rotational velocity in the y axis |
| 188 | Five_percentile_PRV_Y | 5 percentile value for rotational velocity in the y axis |
| 189 | Fifty_percentile_PRV_Y | 50 percentile value for rotational velocity in the y axis |
| 190 | Nine_five_percentile_PRV_Y | 95 percentile value for rotational velocity in the y axis |
| 191 | Avg_Slope_PRV_Y | Average slope for rotational velocity in the y axis |
| 192 | PRV_Y_Area_curve_1_16 | Area under the curve sample 1 to 16 for rotational velocity in the y axis |
| 193 | PRV_Y_Area_curve_17_32 | Area under the curve sample 17 to 32 for rotational velocity in the y axis |
| 194 | PRV_Y_Area_curve_33_48 | Area under the curve sample 33 to 48 for rotational velocity in the y axis |
| 195 | PRV_Y_Area_curve_49_64 | Area under the curve sample 49 to 64 for rotational velocity in the y axis |
| 196 | PRV_Y_Area_curve_65_80 | Area under the curve sample 65 to 80 for rotational velocity in the y axis |
| 197 | PRV_Y_Area_curve_81_96 | Area under the curve sample 81 to 96 for rotational velocity in the y axis |
| 198 | PRV_Y_Area_curve_97_112 | Area under the curve sample 97 to 112 for rotational velocity in the y axis |
| 199 | PRV_Y_Area_curve_113_128 | Area under the curve sample 113 to 128 for rotational velocity in the y axis |
| 200 | PRV_Y_Area_curve_129_144 | Area under the curve sample 129 to 144 for rotational velocity in the y axis |
| 201 | PRV_Y_Area_curve_145_160 | Area under the curve sample 145 to 160 for rotational velocity in the y axis |
| 202 | HFD_PRV_Y | Higuchi fractal dimension for rotational velocity in the y axis |
| 203 | PRV_Z | Maximum absolute value rotational velocity in the z axis |
| 204 | Peak_to_Peak_PRV_Z | Peak to peak for maximum and minimum absolute value rotational velocity in the z axis |
| 205 | zerocrossrate_PRV_Z | Zero cross rate rotational velocity in the z axis |
| 206 | Numzerocross_PRV_Z | Number of zero cross rotational velocity in the z axis |
| 207 | RA_PRV_Z | Maximum absolute value of derivative rotational velocity in the z axis |
| 208 | Area_Curve_PRV_Z | Area under the curve (integral) using trapezoidal numerical integration for rotational velocity in the z axis |
| 209 | Sample_Entropy_PRV_Z | Sample entropy for rotational velocity in the z axis |
| 210 | Five_percentile_PRV_Z | 5 percentile value for rotational velocity in the z axis |
| 211 | Fifty_percentile_PRV_Z | 50 percentile value for rotational velocity in the z axis |
| 212 | Nine_five_percentile_PRV_Z | 95 percentile value for rotational velocity in the z axis |
| 213 | Avg_Slope_PRV_Z | Average slope for rotational velocity in the z axis |
| 214 | PRV_Z_Area_curve_1_16 | Area under the curve sample 1 to 16 for rotational velocity in the z axis |
| 215 | PRV_Z_Area_curve_17_32 | Area under the curve sample 17 to 32 for rotational velocity in the z axis |
| 216 | PRV_Z_Area_curve_33_48 | Area under the curve sample 33 to 48 for rotational velocity in the z axis |
| 217 | PRV_Z_Area_curve_49_64 | Area under the curve sample 49 to 64 for rotational velocity in the z axis |
| 218 | PRV_Z_Area_curve_65_80 | Area under the curve sample 65 to 80 for rotational velocity in the z axis |
| 219 | PRV_Z_Area_curve_81_96 | Area under the curve sample 81 to 96 for rotational velocity in the z axis |
| 220 | PRV_Z_Area_curve_97_112 | Area under the curve sample 97 to 112 for rotational velocity in the z axis |
| 221 | PRV_Z_Area_curve_113_128 | Area under the curve sample 113 to 128 for rotational velocity in the z axis |
| 222 | PRV_Z_Area_curve_129_144 | Area under the curve sample 129 to 144 for rotational velocity in the z axis |
| 223 | PRV_Z_Area_curve_145_160 | Area under the curve sample 145 to 160 for rotational velocity in the z axis |
| 224 | HFD_PRV_Z | Higuchi fractal dimension for rotational velocity in the z axis |
| 225 | PRV_Res | Maximum absolute value resultant rotational velocity |
| 226 | Peak_to_Peak_PRV_Res | Peak to peak from maximum to minimum absolute value resultant rotational velocity |
| 227 | zerocrossrate_PRV_Res | Zero cross rate resultant rotational velocity |
| 228 | Numzerocross_PRV_Res | Number of zero cross resultant rotational velocity |
| 229 | RA_PRV_Res | Maximum absolute value of derivative resultant rotational velocity |
| 230 | Area_Curve_PRV_Res | Area under the curve (integral) using trapezoidal numerical integration for resultant rotational velocity |
| 231 | Sample_Entropy_PRV_Res | Sample entropy for resultant rotational velocity |
| 232 | Five_percentile_PRV_Res | 5 percentile value for resultant rotational velocity |
| 233 | Fifty_percentile_PRV_Res | 50 percentile value for resultant rotational velocity |
| 234 | Nine_five_percentile_PRV_Res | 95 percentile value for r resultant rotational velocity |
| 235 | Avg_Slope_PRV_Res | Average slope for resultant rotational velocity |
| 236 | PRV_Res_Area_curve_1_16 | Area under the curve sample 1 to 16 for resultant rotational velocity |
| 237 | PRV_Res_Area_curve_17_32 | Area under the curve sample 17 to 32 for resultant rotational velocity |
| 238 | PRV_Res_Area_curve_33_48 | Area under the curve sample 33 to 48 for resultant rotational velocity |
| 239 | PRV_Res_Area_curve_49_64 | Area under the curve sample 49 to 64 for resultant rotational velocity |
| 240 | PRV_Res_Area_curve_65_80 | Area under the curve sample 65 to 80 for resultant rotational velocity |
| 241 | PRV_Res_Area_curve_81_96 | Area under the curve sample 81 to 96 for resultant rotational velocity |
| 242 | PRV_Res_Area_curve_97_112 | Area under the curve sample 97 to 112 for resultant rotational velocity |
| 243 | PRV_Res_Area_curve_113_128 | Area under the curve sample 113 to 128 for resultant rotational velocity |
| 244 | PRV_Res_Area_curve_129_144 | Area under the curve sample 129 to 144 for resultant rotational velocity |
| 245 | PRV_Res_Area_curve_145_160 | Area under the curve sample 145 to 160 for resultant rotational velocity |
| 246 | HFD_PRV_Res | Higuchi fractal dimension for resultant rotational velocity |
| 247 | AccelRes_Fq_Band_0_200Hz | Peak magnitude of CWT coefficients (0–200 Hz in 200 Hz bands) for resultant linear acceleration |
| 248 | AccelRes_Fq_Band_200_400Hz | Peak magnitude of CWT coefficients (200–400 Hz in 200 Hz bands) for resultant linear acceleration |
| 249 | AccelRes_Fq_Band_400_600Hz | Peak magnitude of CWT coefficients (400–600 Hz in 200 Hz bands) for resultant linear acceleration |
| 250 | AccelRes_Fq_Band_600_800Hz | Peak magnitude of CWT coefficients (600–800 Hz in 200 Hz bands) for resultant linear acceleration |
| 251 | AccelRes_Fq_Band_800_1000Hz | Peak magnitude of CWT coefficients (800–1000 Hz in 200 Hz bands) for resultant linear acceleration |
| 252 | AccelRes_Fq_Band_1000_1200Hz | Peak magnitude of CWT coefficients (1000–1200 Hz in 200 Hz bands) for resultant linear acceleration |
| 253 | AccelRes_Fq_Band_1200_1400Hz | Peak magnitude of CWT coefficients (1200–1400 Hz in 200 Hz bands) for resultant linear acceleration |
| 254 | GyroRes_Fq_Band_0_200Hz | Peak magnitude of CWT coefficients (0–200 Hz in 200 Hz bands) for resultant rotational velocity |
| 255 | GyroRes_Fq_Band_200_400Hz | Peak magnitude of CWT coefficients (200–400 Hz in 200 Hz bands) for resultant rotational velocity |
| 256 | GyroRes_Fq_Band_400_600Hz | Peak magnitude of CWT coefficients (400–600 Hz in 200 Hz bands) for resultant rotational velocity |
| 257 | GyroRes_Fq_Band_600_800Hz | Peak magnitude of CWT coefficients (600–800 Hz in 200 Hz bands) for resultant rotational velocity |
| 258 | GyroRes_Fq_Band_800_1000Hz | Peak magnitude of CWT coefficients (800–1000 Hz in 200 Hz bands) for resultant rotational velocity |
| 259 | GyroRes_Fq_Band_1000_1200Hz | Peak magnitude of CWT coefficients (1000–1200 Hz in 200 Hz bands) for resultant rotational velocity |
| 260 | GyroRes_Fq_Band_1200_1400Hz | Peak magnitude of CWT coefficients (1200–1400 Hz in 200 Hz bands) for resultant rotational velocity |
| 261 | days_since_start | Days of use of the mouthguard since the first use |
| 262 | DAMAGE | Diffuse Axonal, Multi-Axis, General Evaluation.35 |
| 263 | lin | Linear Risk.31 |
| 264 | rot | Rotational Risk.32 |
| 265 | CP | Combined probability of concussion (CPR). 33 |
| 266 | YouthCP | Youth combined probability of concussion (CPyouth) metric. 34 |
| 267 | RV | Rotational Velocity concussion risk. 47 |

| **Table A2.** Percentile g threshold values | |
| --- | --- |
| **Percentile** | **Peak Linear Acceleration (g)** |
| 5% | 6.38 |
| 10% | 6.84 |
| 15% | 7.24 |
| 20% | 7.61 |
| 25% | 7.99 |
| 30% | 8.40 |
| 35% | 8.84 |
| 40% | 9.34 |
| 45% | 9.90 |
| 50% | 10.57 |
| 55% | 11.34 |
| 60% | 12.31 |
| 65% | 13.49 |
| 70% | 15.02 |
| 75% | 17.00 |
| 80% | 19.75 |
| 85% | 23.82 |
| 90% | 30.69 |
| 95% | 46.23 |
